# Supplementary material for: Inhibition of Cpeb3 ribozyme elevates CPEB3 protein expression and polyadenylation of its target mRNAs and enhances object location memory
Source: eLife journal article supplement (doi:10.7554/elife.90116), 2024-02-06
Supplement: fig1-data1 [file Fig.1 source data-1.xlsx]

## Sheet: Fig. 1B
	Time (min)	"-10/72"	+	-	"-233/72/165"	+	-
	0.01	0.799197	0.915582	0.682977	0.841526	0.896851	0.786243
	0.03	0.793625	0.910767	0.676974	0.836602	0.892372	0.780956
	0.1	0.774461	0.894139	0.656414	0.819601	0.876877	0.762741
	0.3	0.722501	0.848506	0.601346	0.772991	0.834144	0.713096
	1	0.569481	0.708663	0.445444	0.630617	0.701082	0.564337
	2	0.412052	0.553427	0.296741	0.473509	0.548774	0.406092
	3	0.305464	0.438311	0.204817	0.357769	0.431574	0.294503
	5	0.184437	0.289641	0.112867	0.209513	0.271845	0.160128
	7	0.128958	0.207886	0.0777306	0.128706	0.176963	0.0929466
	8	0.113793	0.182072	0.0694331	0.103303	0.145074	0.073203
	9	0.103526	0.162929	0.0643039	0.0844873	0.120441	0.0591821
	10	0.0965742	0.148733	0.0611332	0.0705323	0.101395	0.0492067
	12	0.0886809	0.130399	0.0579615	0.0524535	0.0752321	0.0370105
	15	0.0840735	0.117134	0.0564633	0.0391909	0.054131	0.0288575
	30	0.082006	0.108103	0.0560003	0.0292847	0.0351767	0.0237076
Means	A	0.72	0.72	0.72	0.78	0.78	0.78
	k1	0.39	0.39	0.39	0.31	0.31	0.31
	B				0.035	0.035	0.035
	k2				0.17	0.17	0.17
	C	0.082	0.082	0.082	0.029	0.029	0.029
Errors	A		0.09	0.09		0.044	0.044
	k1		0.091	0.091		0.044	0.044
	B					0.0057	0.0057
	k2					0.023	0.023
	C		0.026	0.026		0.0054	0.0054

## Sheet: Fig. 1G
Time	ASO				Model				control
0.1	1	1	1	1	0.93	0.99	0.98	0.985	1	1
1	0.75	0.9	0.9	0.86	0.75	0.9	0.87	0.88	0.76	0.75
3	0.74	0.82	0.83	0.75	0.75	0.83	0.85	0.74	0.67	0.51
10	0.74	0.8	0.85	0.64	0.74	0.8	0.84	0.63	0.44	0.35
30	0.74	0.8	0.85	0.62	0.74	0.8	0.84	0.62	0.27	0.19
