# Supplementary material for: Inhibition of Cpeb3 ribozyme elevates CPEB3 protein expression and polyadenylation of its target mRNAs and enhances object location memory
Source: eLife journal article supplement (doi:10.7554/elife.90116), 2024-02-06
Supplement: fig4-data1 [file Fig.4 source data-1.xlsx]

## Sheet: FIg. 4B
	Ctrl-ASO							ASO
Control	1	1	1	1	1	1	1	1.25091	1.28418	2.05052	1.31624	2.03381	1.12621	1.55627
KCl	1.21424	1.34076	1.1413	0.875112	1.08945	1.39399	1.19248	1.40732	1.49442	1.60604	1.2031	1.31083	1.818	1.49662

## Sheet: Fig. 4D
	Ctrl-ASO							ASO
Control	1	1	1	1	1	1	1	1.19291	1.14447	1.43246	0.944897	1.37283	0.604598	1.09566
KCl	1.09789	0.943519	0.716141	0.991562	1.0079	0.686746	0.878008	1.19627	1.59931	1.60458	0.940835	0.921872	0.934923	1.60196

## Sheet: FIg. 4E
	Ctrl-ASO							ASO
Control	1	1	1	1	1	1	1	0.849511	1.11822	1.72687	0.950969	1.36444	0.730336	1.07038
KCl	0.93277	1.09608	0.897144	0.889668	0.866989	1.15476	0.989622	0.843566	1.50155	1.17985	0.851825	0.876012	1.36935	1.11095

## Sheet: FIg. 4F
	Ctrl-ASO							ASO
Control	1	1	1	1	1	1	1	0.958728	1.1885	1.89357	1.6941	1.48113	1.29299	1.19028
KCl	1.05461	1.12897	1.14086	1.28083	0.971792	1.51186	0.931443	0.899438	1.63554	1.03599	1.97606	0.924823	1.68595	1.48443

## Sheet: Fig. 4H
	Ctrl-ASO						ASO
Control	1	1	1	1	1	1	1.59449	1.15597	2.94845	1.91615	1.63764	3.37458
KCl	1.38265	1.20413	1.36248	2.01302	2.20099	1.50004	1.54474	1.42981	3.17392	1.77225	2.90367
