# Supplementary material for: Inhibition of Cpeb3 ribozyme elevates CPEB3 protein expression and polyadenylation of its target mRNAs and enhances object location memory
Source: eLife journal article supplement (doi:10.7554/elife.90116), 2024-02-06
Supplement: fig5-data1 [file Fig.5 source data-1.xlsx]

## Sheet: Fig. 5B
PBS	Ctrl-ASO	ASO
1.5053	1.00714	0.820628
1.28367	0.537907	0.829282
1.21366	0.337353	0.610863
0.664398	0.787994	0.520686
0.525819	0.883064	0.346947
0.80715	0.660237	0.462299
		0.876432
		0.483843
		0.468629

## Sheet: Fig. 5C
	PBS						Ctrl-ASO						ASO
Exons 2-3	1.02754	1.29509	1.1003	1.05023	0.44162	1.08522	1.23349	1.12036	0.723499	1.01004	1.05328	0.991595	1.45522	1.40898	1.34929	1.33385	1.13299	1.17038	1.70915	1.20587	1.2958
Exons 3-6	1.27478	0.964971	0.822381	0.891397	1.02999	1.01648	1.34698	1.21161	0.972077	0.951894	0.668665	0.808045	1.54049	1.48859	1.36794	1.3955	1.07476	1.30417	1.90591	1.68845	1.64172
Exons 6-9	1.17954	1.22621	0.961852	0.886976	0.612263	1.13315	1.35426	1.14552	1.08597	0.902212	1.17106		1.30443	1.43271	1.67258	2.29013	1.53596	1.16115	2.16984	2.27479	1.85934

## Sheet: Fig. 5D
PBS	Ctrl-ASO	ASO
1.05449	0.82757	1.19766
0.923577	0.777577	1.28161
1.20603	1.17509	1.03837
0.958552	0.728534	1.07599
1.39646	0.881115	1.01668
0.46089		1.21168
		1.68611
		1.28655
		1.59059

## Sheet: Fig. 5E
PBS	Ctrl-ASO	ASO
1.37072	1.3006	1.70271
1.59331	0.791482	0.758185
1.37518	0.39526	1.85606
0.716326	0.79688	1.07064
0.631804	0.698677	0.536489
0.312659	1.29261	0.659166
		1.87014
		0.77584
		0.683906

## Sheet: Fig. 5F
	PBS						Ctrl-ASO						ASO
CPEB1	1.00651	1.13575	1.38064	0.998446	0.886147	0.592511	1.06618	0.772929	1.3039	1.00311	1.54316		1.28138	1.43723	1.23346	1.14179	0.971523	1.13208	1.28167	0.992296	0.889786
CPEB2	1.36065	0.918713	0.887101	0.868836	0.792227	1.17248	0.843831	0.853307	0.765665	1.00709	0.59422	0.858107	0.878853	1.04578	1.01616	1.03984	0.92808	0.767863	1.07855	0.86563	0.76678
CPEB4	1.05434	0.887097	0.901708	1.0923	0.959514	1.10504	1.01097	0.866971	0.90468	1.18429	0.803111	1.1056	1.02864	1.11965	0.91218	1.14609	1.01888	0.857961	1.35365	1.03513	0.877409

## Sheet: Fig. 5H
	Ctrl-ASO							ASO
CPEB1	0.863115	0.986259	1.4921	1.11607	1.07766	0.723611	0.741183	1.6217	1.22846	1.205	1.10243	0.60094	0.728002
CPEB4	0.82971	1.40683	1.0334	0.942162	0.906697	0.807586	1.07362	1.24518	1.36021	0.968169	0.749808	1.05746	0.98774	1.7184

## Sheet: Fig. 5J
Ctrl-ASO	ASO
0.830227	1.04108
1.23684	1.24039
0.797546	1.13882
1.14112	0.874694
0.879172	1.44008
1.04056	1.71068
1.07453	1.37451
0.835152	1.18122
0.870337	1.17872
1.29451	1.91297

## Sheet: Fig. 5K
	Ctrl						ASO
GluA1	0.78634	0.989186	1.18318	1.60972	0.575507	0.856069	1.22943	1.3422	1.31739	1.36248	1.22034	1.27954	1.02735
GluA2	1.18282	1.1772	1.54567	1.05427	0.438125	0.929097	1.30223	1.69108	1.28093	1.61455	0.7838	0.846475	0.683376
PSD-95	1.34032	1.08487	1.0289	1.14428	0.620368	0.781263	0.887177	1.13277	0.773833	1.05251	1.05671	0.799809	0.710231	0.601996
NR2B	1.09959	1.02862	0.925263	1.20495	0.784975	0.956608	0.766715	1.1543	0.803908	1.10765	1.46949	1.44253	1.02183	1.36533

## Sheet: Fig. 5M
	Ctrl-ASO										ASO
GluA1	1.29185	0.834091	0.87406	1.00508	1.07569	0.892742	0.727353	1.00347	0.999926	1.29574	0.957899	0.760835	0.796173	1.29539	1.18478	0.734912	0.768174	1.38746	1.042	1.9061
GluA2	1.01334	0.829122	1.15754	0.597821	1.31732	1.09398	0.904807	0.921032	0.843336	1.3217	0.850362	0.966279	1.11671	1.0654	1.45296	0.926906	0.758456	0.871735	1.02934	1.6037
PSD-95	0.981041	1.14253	0.876432	0.558856	1.02462	0.876907	1.04963	1.21959	1.11042	1.15998	0.771894	0.872707	0.84357	0.903363	1.03028	0.926463	1.23619	1.63459	1.15335	1.63166
NR2B	1.16477	1.05801	0.777223	0.945071	1.38293	0.822187	0.515572	0.791511	0.931776	1.61095	0.909299	0.508223	0.661352	1.40645	1.32845	0.550677	0.802877	1.25664	1.21481

## Sheet: Fig. 5N
	Ctrl						ASO
GluA1	0.61346	0.465305	1.27403	1.3842	1.26301		1.43659	1.37621	1.54991	0.867792	1.60589	2.00535	1.98277	2.78652
GluA2	1.18327	0.918492	1.53684	0.789237	0.356962	1.2152	1.56113	1.74795	1.3823	0.650784	0.923751	2.30848	2.83061	2.56724
PSD-95	1.03395	0.938477	1.12381	1.01611	0.887655		1.42858	1.55232	1.62389	1.19612	1.24395	1.01772	1.70619	1.36088
NR2B	0.945113	1.03392	0.92754	0.632862	1.21527	1.2453	1.05569	0.748553	0.877243	0.866052	0.860638	1.14265	0.913034	0.712308
