# Supplementary material for: Inhibition of Cpeb3 ribozyme elevates CPEB3 protein expression and polyadenylation of its target mRNAs and enhances object location memory
Source: eLife journal article supplement (doi:10.7554/elife.90116), 2024-02-06
Supplement: fig7-data1 [file Fig.7 source data-1.xlsx]

## Sheet: Fig. 7B
Ctrl-ASO	ASO
1.09288	1.11672
0.672816	0.958083
0.752735	0.94099
0.991446	1.61125
1.41214	1.74207
0.768161	1.05104
1.27191	1.25192
1.01603	1.25475
1.02189	1.42389
	1.42051

## Sheet: Fig. 7C
	Ctrl-ASO										ASO
GluA1	0.845736	1.08327	0.725473	0.862453	0.793956	0.979679	1.1874	1.24031	1.28173		0.914025	0.855833	0.685412	0.934489	1.01521	0.646751	1.13749	1.22199	1.25218
GluA2	0.932337	0.894466	0.752598	0.889663	1.14952	0.909224	1.19816	1.36368	0.910341		0.845366	0.697741	0.716195	1.12237	1.47071	0.944902	1.07095	1.24553	1.4386	1.5639
PSD-95	0.874994	1.38228	1.09852	1.27964	0.900976	0.621399	0.889799	0.857854	1.35995	0.734596	0.893044	1.27674	1.36132	0.979446	1.12589	0.72408	0.818824	0.879027	1.34371	0.914231
NR2B	0.699182	1.09511	0.686526	0.687359	1.24776	0.486755	1.15149	1.78721	1.51332	0.645286	1.01672	0.979689	0.741647	1.48138	1.81657	0.867984	1.30516	1.35528	1.33447	0.749316

## Sheet: Fig. 7D
Ctrl-ASO	ASO
1.10659	1.28437
0.743368	0.968646
0.696791	0.517796
0.620481	1.39409
1.07645	1.34577
1.28023	2.56065
1.20916	3.20252
1.38863	2.55896
	1.72878
0.878293	1.17982

## Sheet: Fig. 7E
	Ctrl-ASO										ASO
GluA1	0.885123	1.0112	1.36127	0.981358	0.932587	0.56294	1.07594	1.42114		0.768437	0.954259	1.5446	1.39707	1.19287	1.24206	1.68508	2.22252	1.37299	1.37382	0.776104
GluA2	0.884438	1.07679	0.914819	1.15593	1.00389	0.810205	1.08593	1.33183		0.73617	0.875633	1.39638	1.06339	1.22716	1.11682	0.858074	2.12459	1.47174	1.03072	0.812276
PSD-95	1.00748	1.00388	1.2446	0.871904	0.639393	1.046	0.940867	1.22107	1.33147	0.693335	1.05431	1.42087	1.25184	0.913316	0.811886	1.42126	1.30764	1.32792	1.78299	1.12506
NR2B	0.916503	0.820607	0.70238	0.931852	1.24404	0.68932	1.02463	1.437	1.46293	0.770748	1.43086	1.82675	0.530788	2.09404	1.45747	1.25802	2.84159	2.24316	1.31718	2.12423
