# Supplementary material for: Inhibition of Cpeb3 ribozyme elevates CPEB3 protein expression and polyadenylation of its target mRNAs and enhances object location memory
Source: eLife. 2024 Feb 6;13:e90116. doi: 10.7554/eLife.90116 (PMC10919898; doi:10.7554/eLife.90116)
Supplement: Figure 2—source data 1. [file elife-90116-fig2-data1.xlsx]

## Sheet: Fig. 2A
Time	Ex 2-3			Ex 3-6			Ex 6-9
0	0.961901	1.07106	0.967037	1.00694	1.03987	0.953187	1.03753	1.09044	0.872037
1	1.4267	1.57981	0.903634	1.41367	1.10879	0.834841	1.79753	1.3391	1.03981
2	1.10078	1.00128	0.975702	1.5702	1.66202	1.77305	1.38453	1.59986	2.74773
4	0.306678	0.367024	0.480122	0.73981	0.814891	0.882337	0.568084	0.84521	1.09345
8	0.412144	0.391468	0.479656	0.573794	0.556305	0.631995	0.72698	0.696705	0.91899
24	0.393263	0.518794	0.538953	0.745005	0.736319	0.765818	0.928925	0.830101	0.962347

## Sheet: Fig. 2B
Time	Uncleaved Rz						Total Rz
0	0.488847	0.326807	0.40755	0.420736	0.325576	0.208822	1.16339	0.832273	1.00433	1.11981	0.972046	0.908142
1	0.321104	0.630182	0.439083	0.509955	0.477239		1.18082	1.27382	1.56593	2.77254	2.30909
2	0.169242	0.211873	0.0733307				0.444873	0.356579	0.253016
4	0.193858	0.145174	0.163126				0.43722	0.286333	0.399265
8	0.133663	0.184669	0.23434				0.309626	0.365801	0.457299
24	0.153595	0.171846	0.109121				0.309916	0.346697	0.310603

## Sheet: Fig. 2C
Time	Ex 2-3						Ex 3-6							Ex 6-9
0	1.09614	0.903864	1.20157	1.0272	0.725696	1.04553	1.23141	0.993048	0.775544	0.954068	1.0154	1.16742	0.863115	0.968953	0.852125	1.17892	0.773624	0.703905	1.35694	1.16553
2	1.52798	1.03431	2.60808	3.25146			0.907579	0.888348	1.95081	1.63776				0.936711	0.954959	3.5974	2.35851
4	0.784219	0.827076	1.04832	0.971044			1.29703	1.58775	1.28737	1.03667				0.546715	0.421671	0.765519
6	1.39017	1.41442	0.963689	1.25113			0.946661	0.945304	1.0559	1.02246				1.42418	1.46362	1.52906	1.42939
8	0.6361	1.19283	1.20332	1.20332	0.700449	1.23899	1.02358	1.04771	1.28707	0.742986	0.397762	0.965177		0.583416	0.278376	0.777673	0.898991	0.960106	1.91213
24	0.310892	0.72024	0.544623				1.32683	0.834889	0.835102					0.68749	0.535868	0.41474

## Sheet: Fig. 2D
Time	Uncleaved Rz									Total Rz
0	0.17348	0.197071	0.234725	0.114428	0.175985	0.580191	0.0618839	0.0491196	0.236044	0.91363	1.08637	1.29649	0.623491	1.08002	1.84377	0.516239	0.315207	1.32479
1	0.0746541	0.223873	0.0661981	0.0200627						1.44128	2.03964	1.87556	1.45829
2	0.119398	0.190065	0.315199	0.235463						2.0159	2.20979	2.36447	3.00075
4	0.101017	0.112565	0.203505	0.0835295	0.125646	0.512102				1.96491	1.06077	2.41651	1.50668	1.53359	3.03216
8	0.357119	0.0697071	0.379924	0.558144	0.179419	0.351323				1.76195	0.774802	2.19495	2.45982	0.878951	2.06683
24	0.330062	0.60472	0.349212							1.2402	1.42578	1.00207
