# Supplementary material for: Inhibition of Cpeb3 ribozyme elevates CPEB3 protein expression and polyadenylation of its target mRNAs and enhances object location memory
Source: eLife. 2024 Feb 6;13:e90116. doi: 10.7554/eLife.90116 (PMC10919898; doi:10.7554/eLife.90116)
Supplement: Figure 3—source data 1. [file elife-90116-fig3-data1.xlsx]

## Sheet: Fig. 3A
	Ctrl-ASO						ASO
Control	1.10801	0.812474	1.07951	0.801507	1.28911	0.909386	0.799602	0.816485	0.726723	0.870214	0.710974
KCl	1.02494	1.4522	1.06103	2.16907	2.10491	1.77088	0.801947	1.15021	1.15071	0.987551	0.800501	0.540269

## Sheet: Fig. 3B
	Ctrl-ASO						ASO
Control	0.818785	1.08481	1.09641	0.784641	1.08603	1.12933	1.55179	1.48405	1.36838	2.02702	1.51654	1.11191
KCl	0.957183	0.636148	0.59179	1.57679	0.816764	1.12011	1.39433	1.21522	1.70832	1.54882	1.26362	1.67673

## Sheet: FIg. 3C
	Ctrl-ASO						ASO
Control	0.860781	1.04308	1.09614	0.881474	0.807244	1.31128	1.20284	1.33852	1.26411	1.82845	1.75183	1.43754
KCl	1.32863	1.07766	1.00553	1.34708	1.37937	1.44561	1.23888	1.19197	1.04225	1.42191	1.62427

## Sheet: Fig. 3D
	Ctrl-ASO						ASO
Control	0.860781	1.04308	1.09614	0.881474	0.807244	1.31128	1.20284	1.33852	1.26411	1.82845	1.75183	1.43754
KCl	1.32863	1.07766	1.00553	1.34708	1.37937	1.44561	1.23888	1.19197	1.04225	1.42191	1.62427

## Sheet: Fig. 3E
	Ctrl-ASO						ASO
Control	0.86841	0.760504	1.37109	0.750282	0.758527	1.49119	1.108	0.641483	1.3966	0.646121	0.700086	0.512133
KCl	1.0605	0.876683	1.2656	1.01919	0.786889	0.916441	1.78754	0.828561	0.904867	0.874789

## Sheet: Fig. 3F
	Ctrl-ASO						ASO
Control	0.831888	0.864969	1.30314	1.43899	0.806355	0.754654	1.21171	1.12111	1.3824	0.888649	0.976707	1.52916
KCl	0.542016	0.314533	0.484361	1.23268	1.50047	1.25497	0.808991	0.780329	1.91494	1.56364	1.37983

## Sheet: Fig. 3G
	Ctrl-ASO						ASO
Control	0.802856	0.927183	1.26996	1.49572	0.718086	0.786198	1.24699	0.936739	1.48236	1.19967	1.55945	1.47141
KCl	0.958637	0.935292	1.23316	1.10751	1.35769	1.18094	1.54319	1.2034	1.68666	1.65396	1.33717

## Sheet: Fig. 3H
	Ctrl-ASO						ASO
Control	0.898213	0.959065	1.14272	1.61446	0.575759	0.80978	1.75802	0.769462	1.01164	0.888754	1.36077	1.52991
KCl	0.940451	1.01909	1.40522	1.01256	1.50416	1.12	1.0604	0.776574	1.46953	1.69233	1.39076

## Sheet: Fig. 3I
Ctrl-ASO	ASO
0.922377	1.52029
1.15845	1.36614
0.919177	1.35206
0.670198	1.7112
1.00196	1.7959
1.32784	1.20874

## Sheet: Fig. 3J
	Ctrl-ASO						ASO
Control	0.71635	1.19549	1.08816	0.788173	0.646369	1.56546	0.586886	0.867997	0.945403	0.922516	1.00695
KCl	1.72034	1.32003	1.03186	1.08355	1.21234	1.26123	0.758606	0.833069	0.999809	1.78124	1.30977

[truncated: 2 more sheets: Fig. 3K, Fig. 3L]
