# Supplementary material for: Inhibition of Cpeb3 ribozyme elevates CPEB3 protein expression and polyadenylation of its target mRNAs and enhances object location memory
Source: eLife. 2024 Feb 6;13:e90116. doi: 10.7554/eLife.90116 (PMC10919898; doi:10.7554/eLife.90116)
Supplement: Figure 6—source data 1. [file elife-90116-fig6-data1.xlsx]

## Sheet: Fig. 6B
Homecage	Trainied
1.17447	1.26072
1.21835	1.36037
0.666314	1.3862
1.06926	1.24226
0.871595	1.43054

## Sheet: Fig. 6C
Homecage	Trainied
1.16593	1.05445
1.09696	1.09355
1.02374	1.31377
0.904676	1.41733
0.808702	1.08898

## Sheet: Fig. 6D
Homecage	Trainied
1.32008	1.44291
1.04717	1.16979
0.706291	2.4253
0.926462	1.92824
	1.88665

## Sheet: Fig. 6E
Homecage	Trainied
0.985332	0.917859
0.958994	0.966969
0.950477	0.953753
0.968488	0.941832
0.971523	0.9795

## Sheet: Fig. 6G
	Ctrl-ASO									ASO
Train	-8.5684	-11.164	-7.78185	-8.06689	5.2355	2.24087	-3.53409	-9.56423	13.2606	-1.70436	-15.7835	-19.0462	12.5396	-5.00351	-14.3424	-3.9682	-13.4667	1.48208	-8.37115
Test	2.22509	11.0809	8.61936	37.4189	4.31023	13.2857	6.36147	-2.69159	15.2602	22.1191	45.4621	13.9329	28.215	18.1477	36.3291	29.7777	28.5155	34.6968	22.4362

## Sheet: Fig. 6H
	Ctrl-ASO									ASO
Train	13.223	13.454	19.931	14.95	20.552	15.649	17.119	8.835	14.381	24.408	14.173	13.21	19.57	12.811	11.093	14.339	13.396	19.972	18.289
Test	6.7315	6.4625	8.57995	5.7945	5.4235	8.387	6.5355	8.3595	8.5785	7.37	5.1595	8.8775	7.9305	3.8775	7.613	5.5585	4.6055	6.028	10.165
