# Supplementary figures and images for: Inhibition of Cpeb3 ribozyme elevates CPEB3 protein expression and polyadenylation of its target mRNAs and enhances object location memory
Source: eLife journal article supplement (doi:10.7554/elife.90116), 2024-02-06

**Figure 1**

**F**

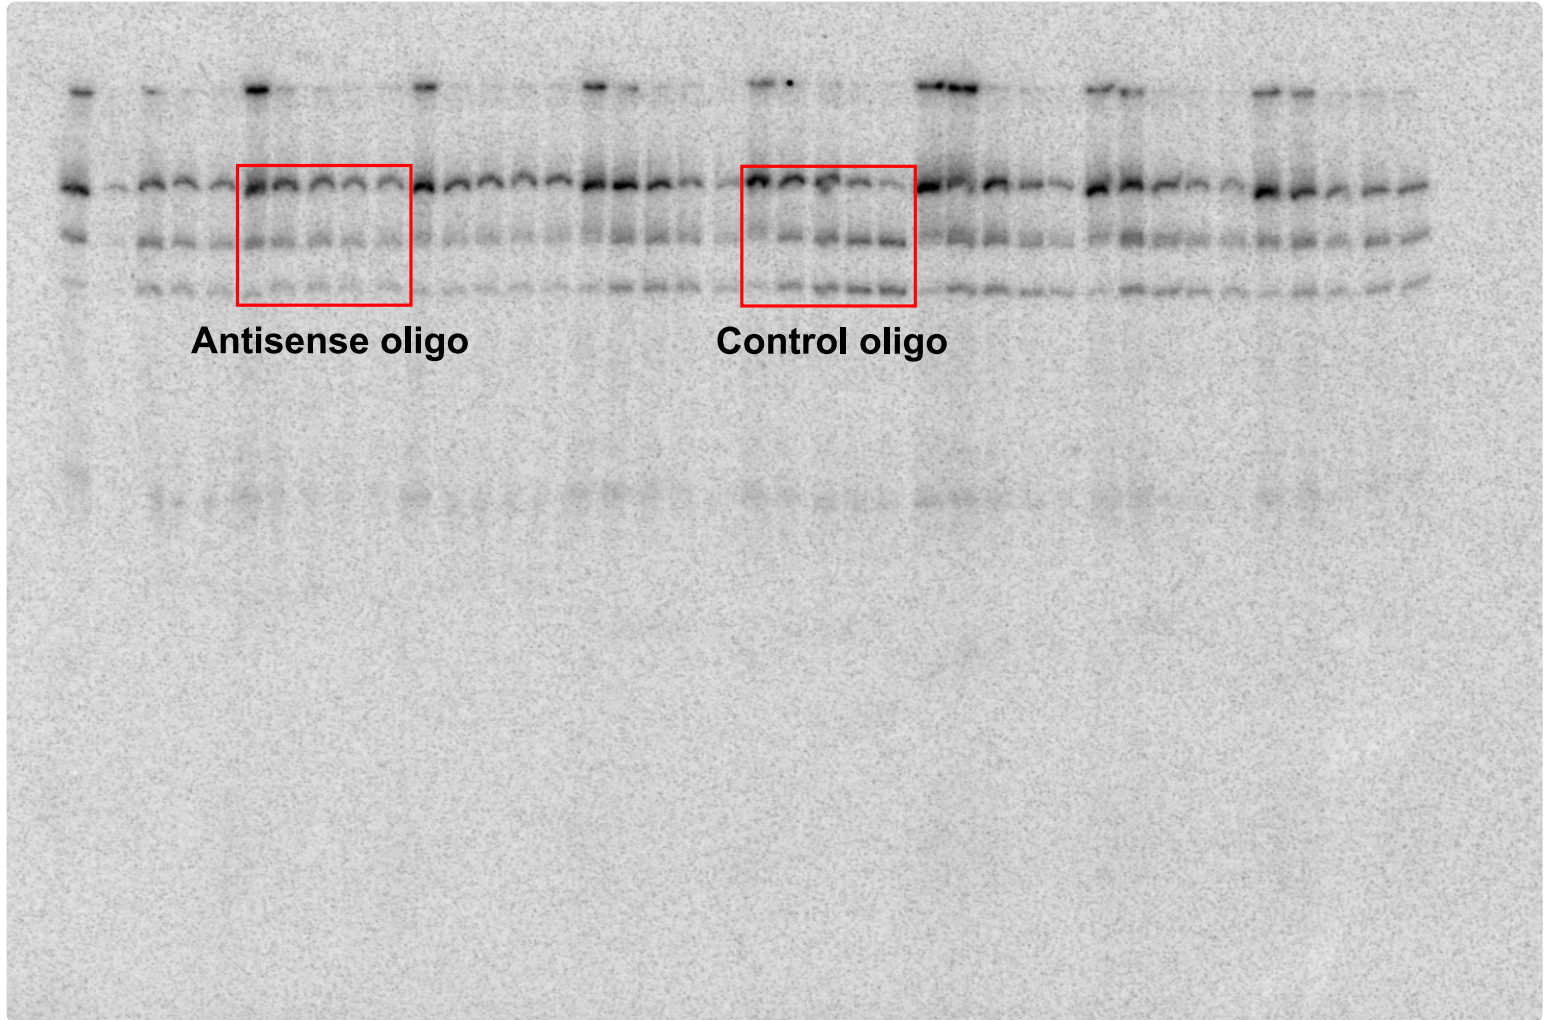

Supplement: fig1-data1 [file elife-90116-fig1-data1-v2.zip]

**Figure 4**

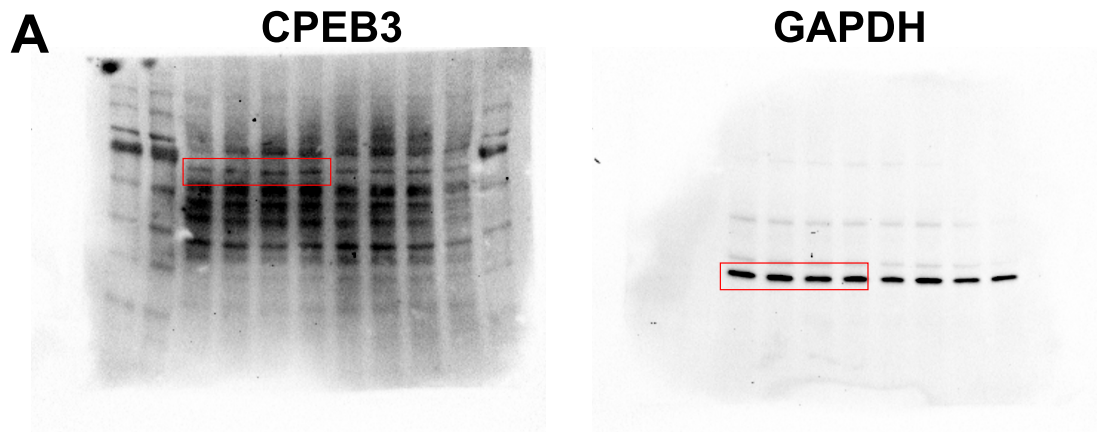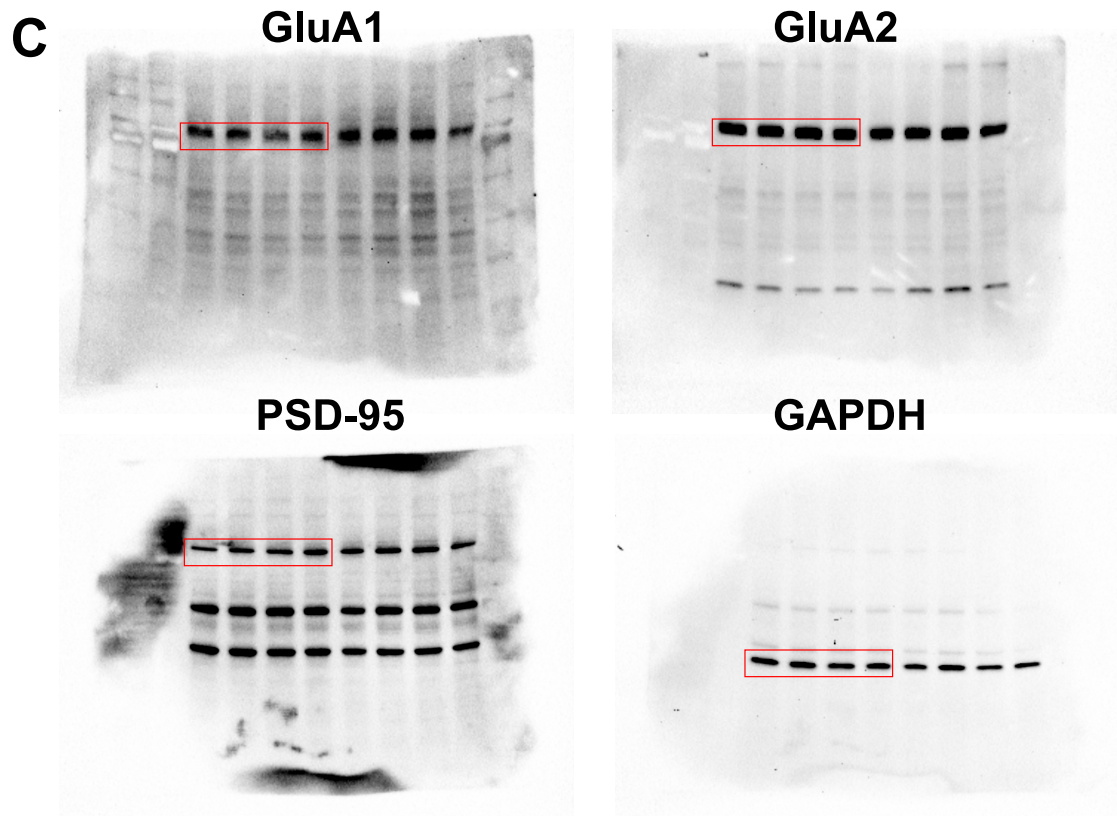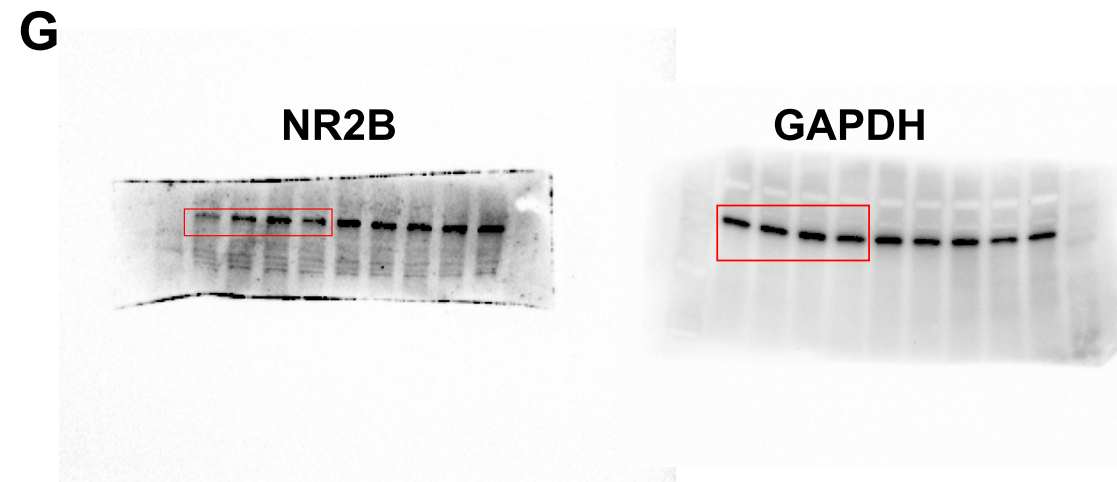

Supplement: fig4-data1 [file elife-90116-fig4-data1-v2.zip]

Figure 5

G

CPEB1

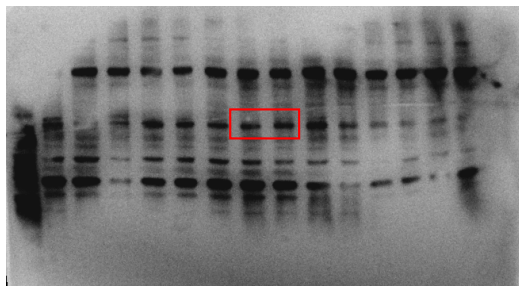

CPEB4

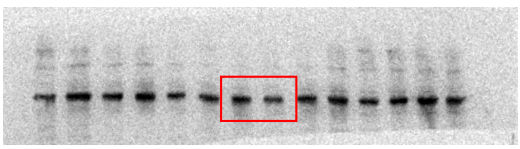

GAPDH

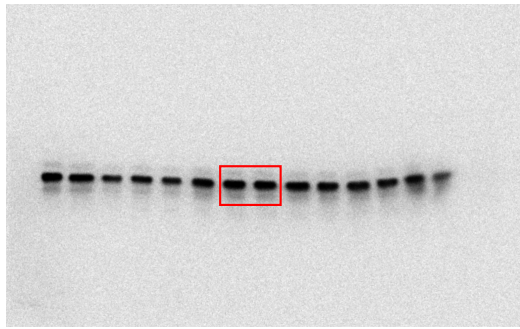

I

CPEB3

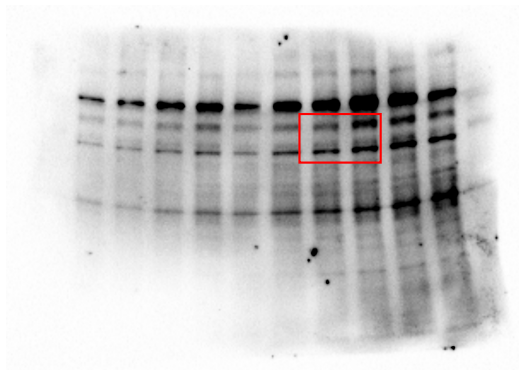

GAPDH

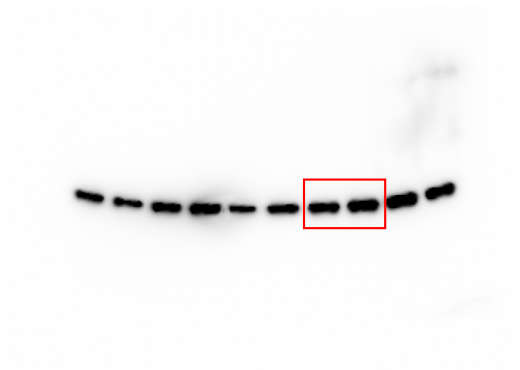

L

GluA1

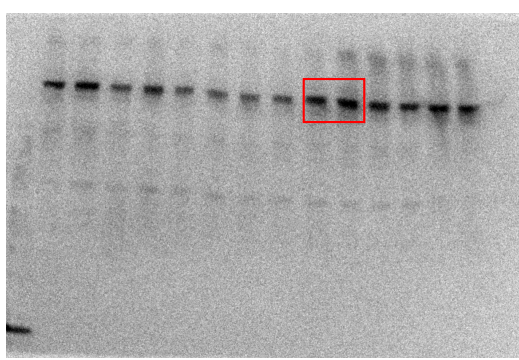

GluA2

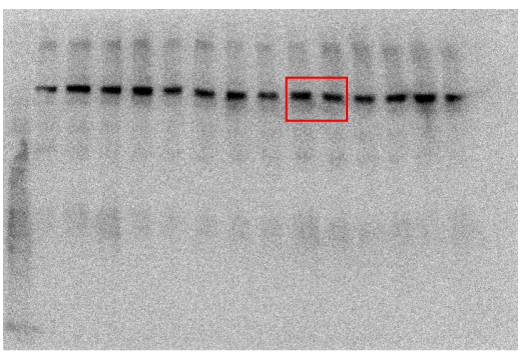

PSD-95

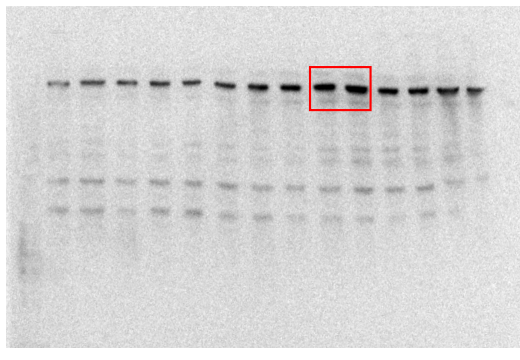

NR2B

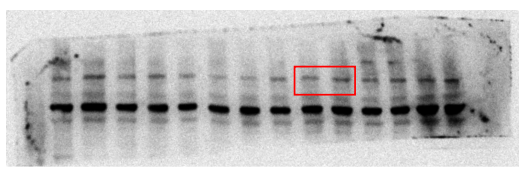

GAPDH

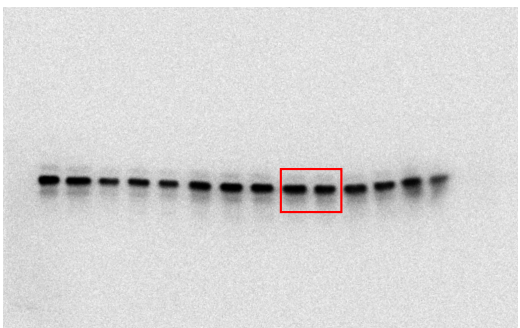

Supplement: fig5-data1 [file elife-90116-fig5-data1-v2.zip]

**Figure 7**

**A**

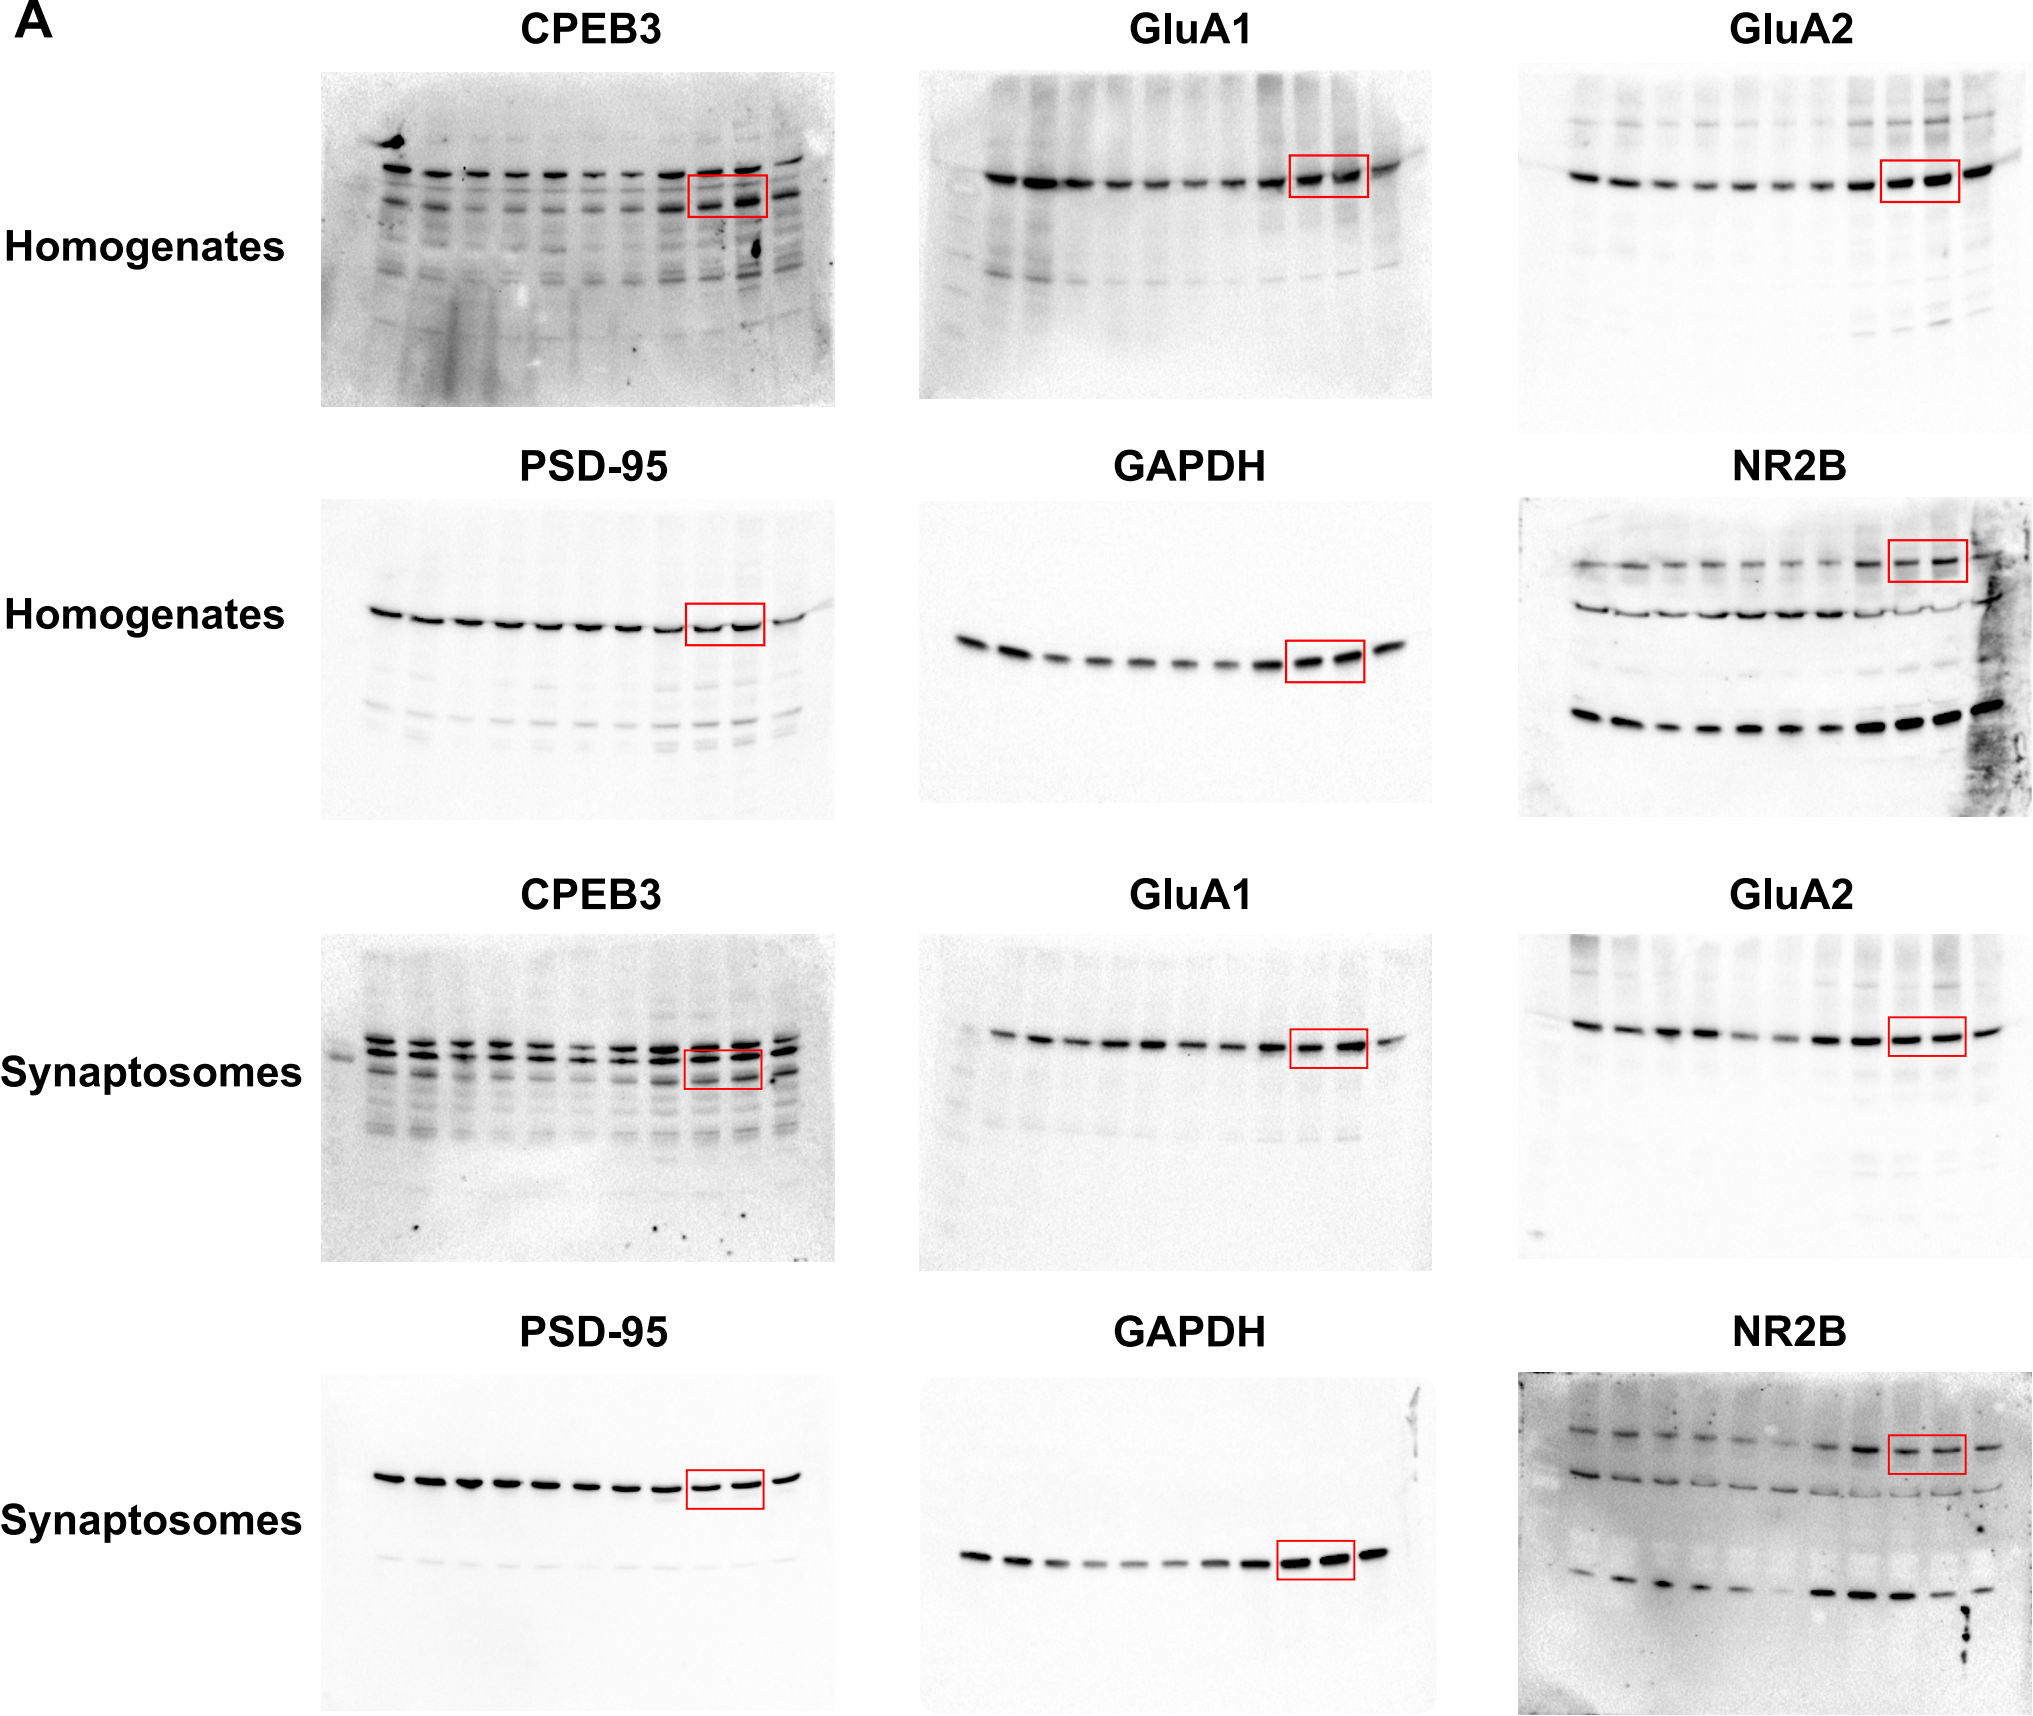

Supplement: fig7-data1 [file elife-90116-fig7-data1-v2.zip]
